# Supplementary material
Source: PubMed Central journal article supplement (PMC7306496)
Supplement: 134_2020_6150_MOESM1_ESM.pdf [file 134_2020_6150_MOESM1_ESM.pdf]

# Between-centre differences for COVID-19 ICU mortality from early data in England

## ANALYSIS SUPPLEMENT

Zhaozhi Qian<sup>1</sup>, Ahmed M. Alaa<sup>2</sup>, Mihaela van der Schaar<sup>1</sup>, and Ari Ercole<sup>3,\*</sup>

<sup>1</sup>University of Cambridge Centre for Mathematical Sciences, Wilberforce Rd, Cambridge CB3 0WA, UK

<sup>2</sup>University of California, Los Angeles, CA 90095, USA

<sup>3</sup>University of Cambridge Division of Anaesthesia, Addenbrooke's Hospital, Hills Road, Cambridge CB2 0QQ, UK

\*Corresponding author

This file contains the code from the analysis as canonical documentation of the pre-processing and modelling assumptions.

### Final model results

#### Fixed effects

| Fixed effect                    | Log hazard ratio | Hazard ratio for mortality | S.E. of log HR | <i>p</i> |
|---------------------------------|------------------|----------------------------|----------------|----------|
| Age (years)                     |                  |                            |                |          |
| 50-60                           | 0.53             | 1.69                       | 0.10           | <0.0001  |
| 60-70                           | 1.04             | 2.83                       | 0.09           | <0.0001  |
| 70-80                           | 1.49             | 4.44                       | 0.10           | <0.0001  |
| >80                             | 1.66             | 5.24                       | 0.14           | <0.0001  |
| Male sex                        | 0.19             | 1.21                       | 0.06           | 0.0022   |
| Chronic respiratory disease     | 0.26             | 1.29                       | 0.09           | 0.0037   |
| Asthma requiring treatment      | -0.01            | 0.99                       | 0.09           | 0.87     |
| Chronic heart disease           | 0.32             | 1.38                       | 0.08           | 0.0001   |
| Chronic renal disease           | 0.22             | 1.25                       | 0.10           | 0.026    |
| Chronic liver disease           | 0.17             | 1.18                       | 0.20           | 0.41     |
| Chronic neurological disease    | 0.06             | 1.06                       | 0.14           | 0.67     |
| Diabetes                        | 0.12             | 1.13                       | 0.07           | 0.067    |
| Immunosuppressive treatment     | 0.15             | 1.16                       | 0.13           | 0.27     |
| Immunosuppressive disease       | 0.48             | 1.62                       | 0.16           | 0.0020   |
| Obesity                         | 0.19             | 1.20                       | 0.07           | 0.013    |
| Hypertension                    | 0.10             | 1.11                       | 0.06           | 0.11     |
| Mean APACHE-II score (for site) | 0.08             | 1.09                       | 0.11           | 0.45     |

## Random effects

Random effects Intercept: Std Dev 0.88 Variance 0.77

$p$ \_value for random effect significance: 2.2e-16

| Site number<br>(random effect- arbitrary/ordered) | Hazard ratio estimate for<br>mortality | Lower<br>95%<br>CI | Upper 95% CI |
|---------------------------------------------------|----------------------------------------|--------------------|--------------|
| 1                                                 | 0.048                                  | 0.020              | 0.120        |
| 2                                                 | 0.086                                  | 0.033              | 0.224        |
| 3                                                 | 0.097                                  | 0.037              | 0.255        |
| 4                                                 | 0.147                                  | 0.052              | 0.417        |
| 5                                                 | 0.238                                  | 0.076              | 0.743        |
| 6                                                 | 0.242                                  | 0.125              | 0.467        |
| 7                                                 | 0.259                                  | 0.121              | 0.553        |
| 8                                                 | 0.273                                  | 0.123              | 0.605        |
| 9                                                 | 0.282                                  | 0.087              | 0.914        |
| 10                                                | 0.424                                  | 0.141              | 1.271        |
| 11                                                | 0.478                                  | 0.125              | 1.823        |
| 12                                                | 0.481                                  | 0.127              | 1.827        |
| 13                                                | 0.498                                  | 0.265              | 0.935        |
| 14                                                | 0.527                                  | 0.194              | 1.430        |
| 15                                                | 0.551                                  | 0.175              | 1.736        |
| 16                                                | 0.575                                  | 0.351              | 0.944        |
| 17                                                | 0.588                                  | 0.238              | 1.452        |
| 18                                                | 0.616                                  | 0.403              | 0.942        |
| 19                                                | 0.648                                  | 0.283              | 1.485        |
| 20                                                | 0.669                                  | 0.287              | 1.561        |
| 21                                                | 0.712                                  | 0.407              | 1.248        |
| 22                                                | 0.749                                  | 0.220              | 2.554        |
| 23                                                | 0.757                                  | 0.448              | 1.280        |
| 24                                                | 0.761                                  | 0.296              | 1.954        |
| 25                                                | 0.772                                  | 0.472              | 1.264        |
| 26                                                | 0.786                                  | 0.415              | 1.489        |
| 27                                                | 0.808                                  | 0.476              | 1.371        |
| 28                                                | 0.812                                  | 0.342              | 1.928        |
| 29                                                | 0.865                                  | 0.479              | 1.562        |
| 30                                                | 0.889                                  | 0.246              | 3.213        |
| 31                                                | 0.894                                  | 0.647              | 1.235        |
| 32                                                | 0.899                                  | 0.444              | 1.820        |
| 33                                                | 0.913                                  | 0.384              | 2.173        |
| 34                                                | 0.957                                  | 0.510              | 1.795        |
| 35                                                | 1.008                                  | 0.420              | 2.417        |
| 36                                                | 1.018                                  | 0.681              | 1.521        |
| 37                                                | 1.025                                  | 0.617              | 1.702        |
| 38                                                | 1.029                                  | 0.583              | 1.818        |
| 39                                                | 1.052                                  | 0.672              | 1.647        |
| 40                                                | 1.055                                  | 0.622              | 1.790        |
| 41                                                | 1.069                                  | 0.568              | 2.013        |
| 42                                                | 1.084                                  | 0.532              | 2.207        |
| 43                                                | 1.091                                  | 0.478              | 2.488        |
| 44                                                | 1.119                                  | 0.755              | 1.657        |
| 45                                                | 1.148                                  | 0.620              | 2.127        |
| 46                                                | 1.166                                  | 0.719              | 1.891        |
| 47                                                | 1.173                                  | 0.666              | 2.067        |
| 48                                                | 1.190                                  | 0.518              | 2.735        |
| 49                                                | 1.192                                  | 0.744              | 1.911        |
| 50                                                | 1.192                                  | 0.749              | 1.898        |
| 51                                                | 1.208                                  | 0.571              | 2.557        |
| 52                                                | 1.226                                  | 0.684              | 2.197        |
| 53                                                | 1.258                                  | 0.797              | 1.986        |
| 54                                                | 1.280                                  | 0.670              | 2.445        |
| 55                                                | 1.284                                  | 0.730              | 2.258        |
| 56                                                | 1.289                                  | 0.712              | 2.333        |
| 57                                                | 1.310                                  | 0.931              | 1.843        |
| 58                                                | 1.355                                  | 0.775              | 2.370        |
| 59                                                | 1.379                                  | 0.662              | 2.872        |
| 60                                                | 1.419                                  | 0.967              | 2.081        |
| 61                                                | 1.445                                  | 0.876              | 2.385        |
| 62                                                | 1.447                                  | 0.948              | 2.209        |
| 63                                                | 1.454                                  | 0.841              | 2.514        |
| 64                                                | 1.456                                  | 0.937              | 2.262        |
| 65                                                | 1.460                                  | 0.696              | 3.062        |
| 66                                                | 1.527                                  | 0.681              | 3.424        |
| 67                                                | 1.553                                  | 0.880              | 2.742        |
| 68                                                | 1.629                                  | 0.803              | 3.304        |
| 69                                                | 1.633                                  | 0.637              | 4.187        |
| 70                                                | 1.688                                  | 0.350              | 8.131        |
| 71                                                | 1.725                                  | 0.919              | 3.238        |
| 72                                                | 1.727                                  | 1.066              | 2.799        |
| 73                                                | 1.749                                  | 0.355              | 8.622        |
| 74                                                | 1.792                                  | 1.168              | 2.751        |
| 75                                                | 1.801                                  | 1.229              | 2.640        |
| 76                                                | 1.840                                  | 0.516              | 6.555        |
| 77                                                | 1.845                                  | 1.216              | 2.799        |
| 78                                                | 1.895                                  | 1.238              | 2.899        |
| 79                                                | 1.992                                  | 1.079              | 3.676        |
| 80                                                | 1.993                                  | 1.204              | 3.298        |
| 81                                                | 2.080                                  | 1.158              | 3.734        |
| 82                                                | 2.168                                  | 1.568              | 2.997        |
| 83                                                | 2.302                                  | 1.431              | 3.705        |
| 84                                                | 2.368                                  | 1.404              | 3.995        |
| 85                                                | 2.371                                  | 1.501              | 3.744        |
| 86                                                | 2.488                                  | 1.749              | 3.538        |
| 87                                                | 2.497                                  | 1.784              | 3.495        |
| 88                                                | 2.521                                  | 1.889              | 3.364        |
| 89                                                | 2.542                                  | 1.589              | 4.066        |
| 90                                                | 2.654                                  | 1.843              | 3.821        |
| 91                                                | 3.170                                  | 2.066              | 4.864        |
| 92                                                | 4.922                                  | 3.307              | 7.326        |

## Sensitivity analysis

To ensure model robustness against temporal bias, we conducted a sensitivity analysis excluding patients with less than 7 days follow-up.

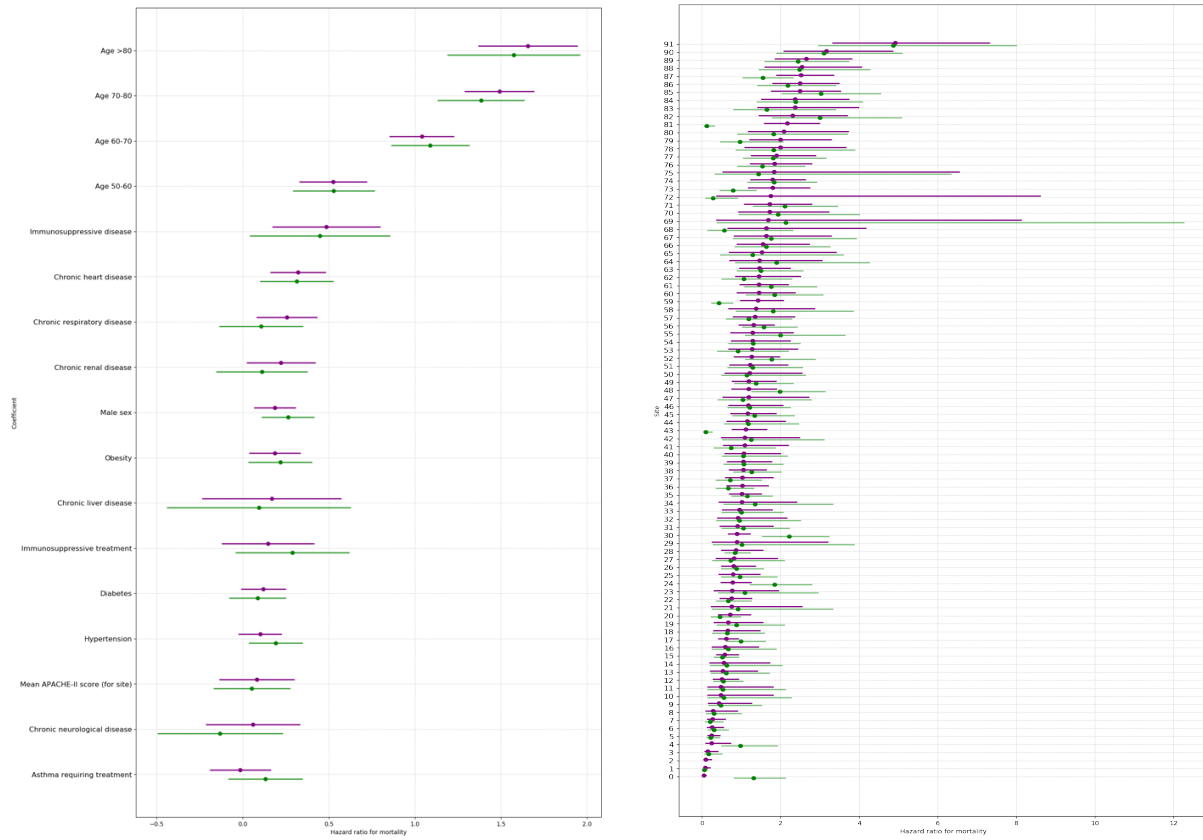

Figure S1. Model (purple) and sensitivity analysis with patients with <7days follow up excluded (green). No substantial temporal ascertainment bias is seen in the fixed effects (left panel) or random effects (right panel).

## Full analysis code

Libraries used (latest versions as of 4/2020)

```
> library(ggplot2)
> library(dplyr)
> library(reshape2)
> library(coxme)
> library(tidyr)
```

### Data cleaning specification

```
> update_date = '22/5/2020'
> update_dt = as.Date('22/5/2020', format="%d/%m/%Y")
> dat = read.csv(file='data/chess-2020-05-24.csv', stringsAsFactors = FALSE)

> names(dat) = tolower(names(dat))

> # table(dat$hospitaladmissiondate) # '%m/%d/%Y'
> # table(dat$finaloutcomedate)

> dat = dat %>%
+   mutate(dateupdated = gsub(".*$", "", dateupdated)) %>%
+   mutate_at(.vars=c('dateupdated', 'hospitaladmissiondate', 'dateadmittedicu', 'dateleavingicu', 'finaloutcomedate'),
+     .funs = function(x) as.Date(x, format="%Y-%m-%d"))

> dt = dat$dateupdated
> dt[is.na(dt)] = update_dt
> dat$dateupdated = dt

> dat = dat %>%
+   mutate(hospital_ttc = as.numeric(dateupdated - hospitaladmissiondate),
+     icu_ttc = as.numeric(dateupdated - dateadmittedicu),
+     outcome_time = as.numeric(finaloutcomedate - hospitaladmissiondate),
+     time_to_icu = as.numeric(dateadmittedicu - hospitaladmissiondate),
+     icu_duration = as.numeric(dateleavingicu - dateadmittedicu)
+   ) %>%
+   mutate(finaloutcome = ifelse(finaloutcome == "Transferred", "", finaloutcome)) %>%
+   mutate_at(.vars=c('dateupdated', 'hospitaladmissiondate', 'dateadmittedicu', 'finaloutcomedate', 'dateleavingicu'),
+     .funs = as.character) %>%
+   mutate_all(.funs=function(x) x = ifelse((x == 'Unknown') | (x == 'No') | (x == 'Borderline'), "", x)) %>%
+   mutate(sex = ifelse(sex == 'Male', 'Male', "")) %>%
+   mutate(
+     death_ind = finaloutcome == 'Death',
+     icu_ind = !is.na(time_to_icu),
+     discharge_ind = finaloutcome == 'Discharged',
+     death_time = coalesce(outcome_time, hospital_ttc),
+     icu_time = coalesce(time_to_icu, hospital_ttc),
+     discharge_time = coalesce(outcome_time, hospital_ttc),
+   ) %>% group_by(caseid) %>% filter(row_number(caseid) == 1) %>% ungroup() %>%
+   filter(wasthepatientadmittedtoicu == 'Yes')

> nrow(dat) - length(unique(dat$caseid))
[1] 0
> sum(is.na(dat$dateupdated))
[1] 0

> sum(is.na(dat$hospitaladmissiondate))
```

```

[1] 0

> sum(is.na(dat$hospital_ttc))
[1] 0

> sum(is.na(dat$death_time))
[1] 0

> sum(is.na(dat$outcome_time))
[1] 1524

> # 5062 icu patients
> nrow(dat)
[1] 5062

> # death 1547
> dat %>%
+ filter(finaloutcome == 'Death') %>%
+ summarise(n=n())
# A tibble: 1 x 1
  n
  <int>
1 1547

> # ICU discharge 1618
> dat %>%
+ filter(!is.na(dateleavingicu) & finaloutcome != 'Death') %>%
+ summarise(n=n())
# A tibble: 1 x 1
  n
  <int>
1 1618

> dat = dat %>%
+ mutate(
+   ageyear = ifelse((is.na(ageyear) | ageyear == 0), median(ageyear, na.rm=TRUE), ageyear),
+   sex = replace_na(sex, 'Male'),
+ )
> dat$age = dat$ageyear
> dat$ageyear = (dat$ageyear - mean(dat$ageyear)) / sd(dat$ageyear)
> nrow(dat)
[1] 5062

> ### trusts
> # trusts = unique(dat$trustname)
> # write.csv(trusts, file='data/letter_trusts.csv')

> trust_scores = read.csv('data/letter_trusts_linked.csv', stringsAsFactors = FALSE)
> apache = read.csv('data/apache.csv', stringsAsFactors = FALSE)
> apache = apache %>%
+ group_by(hospname) %>%
+ summarise(apache = median(apache))

> dat2 = dat %>%
+ inner_join(trust_scores, by='trustname') %>%
+ inner_join(apache, by='hospname')

> dat2$apache_mean = (mean(dat2$apache) - dat2$apache) / sd(dat2$apache)

> dat2$agecut = cut(dat2$age, c(0, 50, 60, 70, 80, 999))

```

```
> table(dat2$agecut)
```

```
(0,50] (50,60] (60,70] (70,80] (80,999]  
1145 1676 1301 707 144
```

### Define and fit Cox model

```
> model = coxme(Surv(death_time , death_ind) ~  
+ agecut +  
+ sex +  
+ chronicrespiratory+  
+ asthmarequiring+  
+ chronicheart +  
+ chronicrenal +  
+ chronicliver +  
+ chronicneurological +  
+ isdiabetes +  
+ immunosuppressiontreatment +  
+ immunosuppressiondisease +  
+ obesityclinical +  
+ hypertension +  
+ apache_mean +  
+ (1|trustcode), dat2 )
```

```
> summary(model)
```

Cox mixed-effects model fit by maximum likelihood

Data: dat2

events, n = 1508, 4973

Iterations= 10 66

NULL Integrated Fitted

Log-likelihood -12152.62 -11521.08 -11382.4

|                   | Chisq   | df    | p | AIC     | BIC     |
|-------------------|---------|-------|---|---------|---------|
| Integrated loglik | 1263.08 | 18.00 | 0 | 1227.08 | 1131.35 |
| Penalized loglik  | 1540.44 | 92.64 | 0 | 1355.16 | 862.46  |

Model: Surv(death\_time, death\_ind) ~ agecut + sex + chronicrespiratory + asthmarequiring + chronicheart + chronicrenal + chronicliver + chronicneurological + isdiabetes + immunosuppressiontreatment + immunosuppressiondisease + obesityclinical + hypertension + apache\_mean + (1 | trustcode)

Fixed coefficients

|                               | coef        | exp(coef) | se(coef)   | z     | p       |
|-------------------------------|-------------|-----------|------------|-------|---------|
| agecut(50,60]                 | 0.52556267  | 1.6914103 | 0.09853076 | 5.33  | 9.6e-08 |
| agecut(60,70]                 | 1.04035339  | 2.8302170 | 0.09403432 | 11.06 | 0.0e+00 |
| agecut(70,80]                 | 1.49044437  | 4.4390676 | 0.10128174 | 14.72 | 0.0e+00 |
| agecut(80,999]                | 1.65566567  | 5.2365646 | 0.14476477 | 11.44 | 0.0e+00 |
| sexMale                       | 0.18682293  | 1.2054138 | 0.06104706 | 3.06  | 2.2e-03 |
| chronicrespiratoryYes         | 0.25562348  | 1.2912664 | 0.08815163 | 2.90  | 3.7e-03 |
| asthmarequiringYes            | -0.01447620 | 0.9856281 | 0.08923171 | -0.16 | 8.7e-01 |
| chronicheartYes               | 0.32175738  | 1.3795500 | 0.08084859 | 3.98  | 6.9e-05 |
| chronicrenalYes               | 0.22207150  | 1.2486607 | 0.09999441 | 2.22  | 2.6e-02 |
| chronicliverYes               | 0.16810960  | 1.1830663 | 0.20216825 | 0.83  | 4.1e-01 |
| chronicneurologicalYes        | 0.05913716  | 1.0609207 | 0.13684876 | 0.43  | 6.7e-01 |
| isdiabetesYes                 | 0.12027089  | 1.1278023 | 0.06565021 | 1.83  | 6.7e-02 |
| immunosuppressiontreatmentYes | 0.14770605  | 1.1591721 | 0.13452276 | 1.10  | 2.7e-01 |
| immunosuppressiondiseaseYes   | 0.48452881  | 1.6234099 | 0.15673605 | 3.09  | 2.0e-03 |
| obesityclinicalYes            | 0.18591816  | 1.2043237 | 0.07480174 | 2.49  | 1.3e-02 |
| hypertensionYes               | 0.10072133  | 1.1059684 | 0.06262017 | 1.61  | 1.1e-01 |
| apache_mean                   | 0.08230137  | 1.0857830 | 0.10979409 | 0.75  | 4.5e-01 |

| Random effects |           |           |           |
|----------------|-----------|-----------|-----------|
| Group          | Variable  | Std Dev   | Variance  |
| trustcode      | Intercept | 0.8769697 | 0.7690758 |

```

> # fixed effects
> coeff_main = fixef(model)
> sd_main = sqrt(diag(vcov(model)))

> df_fixed = data.frame(effect = names(coeff_main),
+   coeff = coeff_main,
+   coeff_sd = sd_main,
+   hr = exp(coeff_main),
+   hr_lower = exp(coeff_main - 2 * sd_main),
+   hr_upper = exp(coeff_main + 2 * sd_main),
+   row.names=NULL)

> write.csv(df_fixed, file = 'letter_fixed_effect_updated.csv')

> # random effects
> coeff_rand = ranef(model)$trustcode
> sd_rand = sqrt(diag(model$variance)[1:length(coeff_rand)])

> df_random = data.frame(effect = names(coeff_rand),
+   coeff = coeff_rand,
+   coeff_sd = sd_rand,
+   hr = exp(coeff_rand),
+   hr_lower = exp(coeff_rand - 2 * sd_rand),
+   hr_upper = exp(coeff_rand + 2 * sd_rand),
+   row.names=NULL)
> write.csv(df_random, file = 'letter_random_effect_updated.csv')

```

## Test random effects

```

> fit1 <- coxph(Surv(death_time, death_ind) ~
+   ageyear +
+   sex +
+   chronicrespiratory+
+   asthmarequiring+
+   chronicheart +
+   chronicrenal +
+   chronicliver +
+   chronicneurological +
+   isdiabetes +
+   immunosuppressiontreatment +
+   immunosuppressiondisease +
+   obesityclinical +
+   hypertension,
+   dat2)
> print(anova(fit1,model))
Analysis of Deviance Table
Cox model: response is Surv(death_time, death_ind)
Model 1: ~ageyear + sex + chronicrespiratory + asthmarequiring + chronicheart + chronicrenal + chronicliver +
chronicneurological + isdiabetes + immunosuppressiontreatment + immunosuppressiondisease + obesityclinical +
hypertension
Model 2: ~agecut + sex + chronicrespiratory + asthmarequiring + chronicheart + chronicrenal + chronicliver +
chronicneurological + isdiabetes + immunosuppressiontreatment + immunosuppressiondisease + obesityclinical +
hypertension + apache_mean + (1 | trustcode)
loglik Chisq Df P(>|Chi|)
1 -11809

```

2 -11521 576.46 5 < 2.2e-16 \*\*\*

---

Signif. codes: 0 '\*\*\*' 0.001 '\*\*' 0.01 '\*' 0.05 '.' 0.1 ' ' 1



## Proportional odds assumption

```
> ## test random effect
```

```
> fit1 <- coxph(Surv(death_time, death_ind) ~
+   ageyear +
+   sex +
+   chronicrespiratory+
+   asthmarequiring+
+   chronicheart +
+   chronicrenal +
+   chronicliver +
+   chronicneurological +
+   isdiabetes +
+   immunosuppressiontreatment +
+   immunosuppressiondisease +
+   obesityclinical +
+   hypertension,
+   dat2)
```

```
> print(anova(fit1,model))
```

Analysis of Deviance Table

Cox model: response is Surv(death\_time, death\_ind)

Model 1: ~ageyear + sex + chronicrespiratory + asthmarequiring + chronicheart + chronicrenal + chronicliver + chronicneurological + isdiabetes + immunosuppressiontreatment + immunosuppressiondisease + obesityclinical + hypertension

Model 2: ~agecut + sex + chronicrespiratory + asthmarequiring + chronicheart + chronicrenal + chronicliver + chronicneurological + isdiabetes + immunosuppressiontreatment + immunosuppressiondisease + obesityclinical + hypertension + apache\_mean + (1 | trustcode)

loglik Chisq Df P(>|Chi)

1 -11809

2 -11521 576.46 5 < 2.2e-16 \*\*\*

---

Signif. codes: 0 '\*\*\*' 0.001 '\*\*' 0.01 '\*' 0.05 '.' 0.1 ' ' 1

```
> # p_value for random effect is 2.2e-16
```

```
> cox_model = coxph(Surv(death_time, death_ind) ~
+   ageyear +
+   sex +
+   chronicrespiratory +
+   asthmarequiring +
+   chronicheart +
+   chronicrenal +
+   chronicliver +
+   chronicneurological +
+   isdiabetes +
+   immunosuppressiontreatment +
+   immunosuppressiondisease +
+   obesityclinical +
+   apache_mean, dat2)
>
```

```
> cox.zph(cox_model, transform='identity')
```

|                     | chisq  | df | p       |
|---------------------|--------|----|---------|
| ageyear             | 11.685 | 1  | 0.00063 |
| sex                 | 2.616  | 1  | 0.10578 |
| chronicrespiratory  | 0.038  | 1  | 0.84552 |
| asthmarequiring     | 3.237  | 1  | 0.07201 |
| chronicheart        | 0.932  | 1  | 0.33444 |
| chronicrenal        | 0.215  | 1  | 0.64310 |
| chronicliver        | 0.163  | 1  | 0.68654 |
| chronicneurological | 0.751  | 1  | 0.38604 |
| isdiabetes          | 0.403  | 1  | 0.52547 |

|                            |        |    |                |
|----------------------------|--------|----|----------------|
| immunosuppressiontreatment | 0.279  | 1  | 0.59724        |
| immunosuppressiondisease   | 1.122  | 1  | 0.28953        |
| obesityclinical            | 0.234  | 1  | 0.62876        |
| apache_mean                | 1.616  | 1  | 0.20368        |
| GLOBAL                     | 21.631 | 13 | <b>0.06135</b> |

Sensitivity analysis (restrict to patients with only 7 days follow-up)

```

> # sensitivity analysis
>
> model = coxme(Surv(death_time , death_ind) ~
+   agecut +
+   sex +
+   chronicrespiratory+
+   asthmarequiring+
+   chronicheart +
+   chronicrenal +
+   chronicliver +
+   chronicneurological +
+   isdiabetes +
+   immunosuppressiontreatment +
+   immunosuppressiondisease +
+   obesityclinical +
+   hypertension +
+   apache_mean +
+
+   (1|trustcode), dat2 %>% filter(death_time > 7))
>
> summary(model)
Cox mixed-effects model fit by maximum likelihood
  Data: dat2 %>% filter(death_time > 7)
  events, n = 979, 4037
  Iterations= 22 137
          NULL Integrated  Fitted
Log-likelihood -7699.123 -7288.402 -7166.196

          Chisq  df p  AIC  BIC
Integrated loglik 821.44 18.00 0 785.44 697.48
Penalized loglik 1065.85 88.61 0 888.64 455.67

Model: Surv(death_time, death_ind) ~ agecut + sex + chronicrespiratory + asthmarequiring + chronicheart + chronicrenal
+ chronicliver + chronicneurological + isdiabetes + immunosuppressiontreatment + immunosuppressiondisease +
obesityclinical + hypertension + apache_mean + (1 | trustcode)
Fixed coefficients

```

|                               | coef        | exp(coef) | se(coef)   | z     | p       |
|-------------------------------|-------------|-----------|------------|-------|---------|
| agecut[50,60]                 | 0.52836784  | 1.6961616 | 0.11900812 | 4.44  | 9.0e-06 |
| agecut[60,70]                 | 1.08862495  | 2.9701871 | 0.11419653 | 9.53  | 0.0e+00 |
| agecut[70,80]                 | 1.38314764  | 3.9874329 | 0.12631705 | 10.95 | 0.0e+00 |
| agecut[80,999]                | 1.57287387  | 4.8204817 | 0.19319242 | 8.14  | 4.4e-16 |
| sexMale                       | 0.26286351  | 1.3006492 | 0.07688069 | 3.42  | 6.3e-04 |
| chronicrespiratoryYes         | 0.10721566  | 1.1131743 | 0.12166589 | 0.88  | 3.8e-01 |
| asthmarequiringYes            | 0.13149276  | 1.1405296 | 0.10865313 | 1.21  | 2.3e-01 |
| chronicheartYes               | 0.31319465  | 1.3677877 | 0.10721581 | 2.92  | 3.5e-03 |
| chronicrenalYes               | 0.11072709  | 1.1170900 | 0.13286081 | 0.83  | 4.0e-01 |
| chronicliverYes               | 0.09363496  | 1.0981588 | 0.26678907 | 0.35  | 7.3e-01 |
| chronicneurologicalYes        | -0.13119391 | 0.8770477 | 0.18274115 | -0.72 | 4.7e-01 |
| isdiabetesYes                 | 0.08648545  | 1.0903355 | 0.08280806 | 1.04  | 3.0e-01 |
| immunosuppressiontreatmentYes | 0.28781337  | 1.3335084 | 0.16557883 | 1.74  | 8.2e-02 |
| immunosuppressiondiseaseYes   | 0.44786594  | 1.5649689 | 0.20403409 | 2.20  | 2.8e-02 |

|                    |            |           |            |      |         |
|--------------------|------------|-----------|------------|------|---------|
| obesityclinicalYes | 0.21865868 | 1.2444065 | 0.09261895 | 2.36 | 1.8e-02 |
| hypertensionYes    | 0.19094188 | 1.2103891 | 0.07863300 | 2.43 | 1.5e-02 |
| apache_mean        | 0.05333766 | 1.0547857 | 0.11157739 | 0.48 | 6.3e-01 |

Random effects

| Group     | Variable  | Std Dev   | Variance  |
|-----------|-----------|-----------|-----------|
| trustcode | Intercept | 0.8877288 | 0.7880625 |

```

> coeff_rand = ranef(model)$trustcode
> sd_rand = sqrt(diag(model$variance)[1:length(coeff_rand)])

> df_random = data.frame(effect = names(coeff_rand),
+   coeff = coeff_rand,
+   coeff_sd = sd_rand,
+   hr = exp(coeff_rand),
+   hr_lower = exp(coeff_rand - 2 * sd_rand),
+   hr_upper = exp(coeff_rand + 2 * sd_rand),
+   row.names=NULL)
> write.csv(df_random, file = 'letter_random_effect_sensitivity.csv')

```
